# Supplementary material for: Comparative analysis of three studies measuring fluorescence from engineered bacterial genetic constructs
Source: PLoS One. 2021 Jun 7;16(6):e0252263. doi: 10.1371/journal.pone.0252263 (PMC8183995; doi:10.1371/journal.pone.0252263)
Supplement: S7 File — Spreadsheet indicating the number of team datasets with valid data points included for each construct and calibration / measurement condition in Fig 4. (XLSX) [file pone.0252263.s007.xlsx]

## Sheet: Sheet1
Team Datasets per Condition in Figure 6
	J23101	J23106	J23117
Plate Reader 2016	14	21	20
Plate Reader 2017	48	66	60
Plate Reader 2018	82	100	94
Flow Cytometer 2016	8	8	8
Flow Cytometer 2018	9	11	9
